# Supplementary material for: Heterostructured binary/ternary MoO 3 /Bi 2 MoO 6 metal oxide-based acetone sensing devices relevant to non-invasive disease monitoring
Source: Royal Society of Chemistry journal article supplement (doi:10.1039/d4tc04045g), 2024-12-24
Supplement: d4tc04045g1.pdf [file d4tc04045g1.pdf]

## SUPPORTING INFORMATION

### Heterostructured binary/ternary MoO<sub>3</sub>/Bi<sub>2</sub>MoO<sub>6</sub> metal oxides based acetone sensing devices relevant to non-invasive disease monitoring

Arpit Verma<sup>1</sup>, Deepankar Yadav<sup>2</sup>, Subramanian Natesan<sup>2</sup>,  
Monu Gupta<sup>1</sup>, Bal Chandra Yadav<sup>1\*</sup>

<sup>1</sup>Nanomaterials and Sensors Research Laboratory, Department of Physics,  
Babasaheb Bhimrao Ambedkar University, Lucknow-226025, U.P., India

<sup>2</sup>Department of Pharmaceutics, NIPER, Kolkata-700054, West Bengal, India

\*Email: balchandra\_yadav@rediffmail.com

#### 1. Characterization tools

To confirm the composition of the desired material, various characterization tools were employed. Surface morphology was investigated using a Field Emission Scanning Electron Microscope (SEM) from JEOL India Pvt. Ltd. (Model: JEOL JSM 7610f). Crystallographic analysis was conducted using a Bruker X-ray Diffractometer (XRD) (Model: D8 Advance Eco). Elemental analysis was carried out using X-ray Photoelectron Spectroscopy (XPS) from Physical Electronics (Model: PHI 5000 VersaProbe III). The functional groups of the materials under investigation were confirmed using a Fourier Transform Infrared Spectrometer (FTIR) from Thermo-Scientific (Model: Nicolet 6700). UV-Visible absorption and energy band gap measurements were performed using a UV-Visible Spectrophotometer from Thermo-Scientific (Model: Evolution 201). Exhaled human breath was collected in Tedlar bags from Shilpent Enterprises India. The acetone gas sensing performance of the prepared sensing device was evaluated using an Electrometer/Source Meter from Keithley (Model: 6517B) to measure electrical parameters. Molecular structures were generated using the Gaussian 09 program, and optimization was carried out using the LanL2DZ basis set in conjunction with the ground state B3LYP density functional theory model.

#### 2. Device fabrication

The spin coating method was used to create the sensing components, which entails applying a continuously thin layer of sensing material onto a substrate that has been well-cleaned. Making a solution with the sensing material dissolved in distilled water was the first stage in this procedure. To guarantee homogeneity, the sensing materials were then coated five times at 1000 rpm on each glass substrate. The film was annealed at 150°C after deposition in order to improve its properties and eliminate any solvent residue. Each gadget was then covered with silver electrodes in preparation for further electrical tests.

#### 3. Experimental set-up

A temperature controller, four sensors, and a heater made up the gas sensing setup in which all of the tests were conducted. The current variations were recorded with the Keithley electrometer. The gas sensor system's interior design consists of four 2-liter sample containers that are each attached to a heated plate. A programmable temperature controller may be used to change the temperature. A micropipette was used to add acetone to the sensing chamber. Human breath was first collected in Tedlar gas collection bags and then injected to observe the response to exhaled breath. The relationship given in (S1) was used to calculate the acetone concentration, which was expressed in parts per million (ppm).

$$V_x = \frac{V \times C \times M}{22.4 \times d \times p} \times 10^{-9} \times \frac{273 + T_r}{273 + T_c} \quad (\text{S1})$$

Where  $V_x$  represents the volume of injected acetone,  $V$  represents the volume of the gas sensing setup,  $C$  represents the part-per-million (ppm) concentration of the injected acetone,  $M$  represents the acetone's molar mass in g/mol,  $d$  represents the specific gravity of the injected liquid in g/cm<sup>3</sup>,  $p$  represents the liquid's purity in percentage,  $T_r$  represents the room temperature, and  $T_c$  represents the temperature of the internal hot plate.

#### 4. SEM and EDS

**Table S1:** Atomic and weight percentage of the elements estimated by EDS spectra

| MoO <sub>3</sub> |         |         | Bi <sub>2</sub> MoO <sub>6</sub> |         |         | MoO <sub>3</sub> /Bi <sub>2</sub> MoO <sub>6</sub> |         |         |
|------------------|---------|---------|----------------------------------|---------|---------|----------------------------------------------------|---------|---------|
| Element          | Weight% | Atomic% | Element                          | Weight% | Atomic% | Element                                            | Weight% | Atomic% |
| O K              | 37.74   | 78.43   | O K                              | 26.66   | 69.41   | O K                                                | 31.23   | 75.04   |
| Mo L             | 62.26   | 21.57   | Mo L                             | 68.00   | 29.52   | Mo L                                               | 56.80   | 22.76   |
| Total            | 100.00  |         | Bi M                             | 5.34    | 1.06    | Bi M                                               | 11.97   | 2.20    |
|                  |         |         | Total                            | 100.00  |         | Total                                              | 100.00  |         |

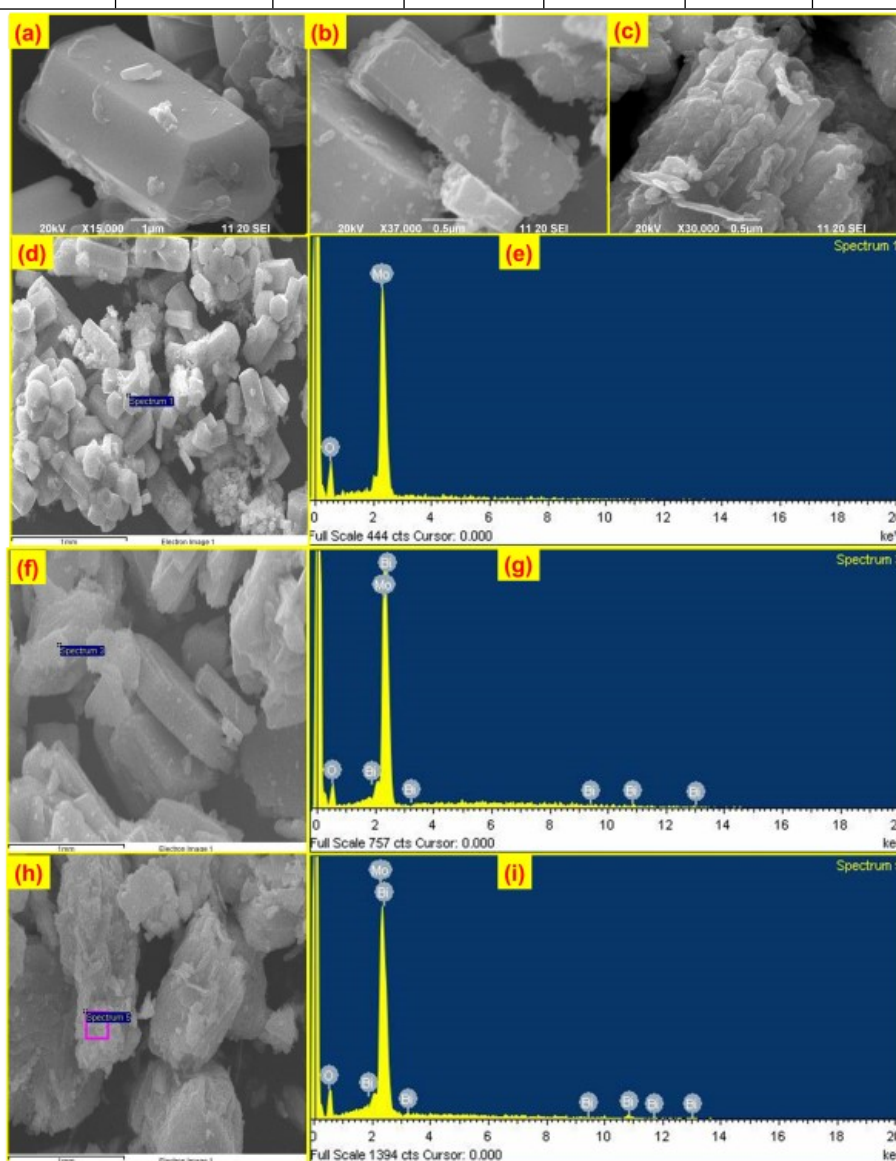

**Fig. S1.** SEM images at the scale of 5  $\mu\text{m}$  of (a) MoO<sub>3</sub> (b) Bi<sub>2</sub>MoO<sub>6</sub> (c) MoO<sub>3</sub>/Bi<sub>2</sub>MoO<sub>6</sub> (d) Image used for EDS scanning for MoO<sub>3</sub> (e) EDS spectrum of MoO<sub>3</sub> (f) Image used for EDS

scanning for Bi<sub>2</sub>MoO<sub>6</sub> (g) EDS spectrum of Bi<sub>2</sub>MoO<sub>6</sub> (h) Image used for EDS scanning for MoO<sub>3</sub>/Bi<sub>2</sub>MoO<sub>6</sub> (i) EDS spectrum of MoO<sub>3</sub>/Bi<sub>2</sub>MoO<sub>6</sub>.

## 5. XRD

**Table S2:** XRD analysis for MoO<sub>3</sub>, Bi<sub>2</sub>MoO<sub>6</sub>, MoO<sub>3</sub>/Bi<sub>2</sub>MoO<sub>6</sub>

| MoO <sub>3</sub> |        |                | Bi <sub>2</sub> MoO <sub>6</sub> |        |                | MoO <sub>3</sub> /Bi <sub>2</sub> MoO <sub>6</sub> |       |                |
|------------------|--------|----------------|----------------------------------|--------|----------------|----------------------------------------------------|-------|----------------|
| 2θ (°)           | FWHM   | Bragg's planes | 2θ (°)                           | FWHM   | Bragg's planes | 2θ (°)                                             | FWHM  | Bragg's planes |
| 12.7767          | 0.1791 | 020            | 12.8246                          | 0.0964 | 020            | 12.787                                             | 0.202 | 020            |
| 23.3685          | 0.3194 | 110            | 23.40853                         | 0.2984 | 120            | 23.409                                             | 0.202 | 110            |
| 25.755           | 0.2535 | 120            | 25.74045                         | 0.289  | 111            | 23.649                                             | 0.313 | 120            |
| 27.3344          | 0.1342 | 021            | 27.33393                         | 0.144  | 131            | 25.821                                             | 0.387 | 111            |
| 27.9558          | 0.1331 | 130            | 33.20259                         | 0.2376 | 200            | 27.239                                             | 0.156 | 021            |
| 33.1657          | 0.2883 | 101            | 33.805                           | 0.2371 | 210            | 33.167                                             | 0.802 | 101            |
| 33.7434          | 0.2883 | 111            | 35.57337                         | 0.2276 | 201            | 33.774                                             | 0.238 | 111            |
| 35.4966          | 0.3218 | 041            | 39.12955                         | 0.3261 | 240            | 35.431                                             | 0.166 | 041            |
| 39.0124          | 0.5768 | 131            | 45.81438                         | 0.3978 | 202            | 39.021                                             | 0.161 | 131            |
| 45.7586          | 0.2894 | 200            | 46.49452                         | 0.3978 | 260            | 46.422                                             | 0.249 | 210            |
| 46.3564          | 0.29   | 210            | 49.31226                         | 0.6115 | 320            | 49.275                                             | 0.157 | 320            |
| 49.2555          | 0.1869 | 002            | 55.29752                         | 0.2697 | 331            | 52.81                                              | 0.393 | 211            |
| 52.5833          | 0.5747 | 211            | 56.44404                         | 0.33   | 082            | 55.258                                             | 0.277 | 331            |
| 54.1125          | 0.5833 | 221            | 64.70292                         | 0.47   | 282            | 56.4                                               | 0.8   | 082            |
| 55.2997          | 0.5901 | 112            | 69.59995                         | 0.2797 | 420            | 58.867                                             | 0.46  | 081            |
| 58.8749          | 1.5246 | 081            | 76.61514                         | 0.5593 | 211            | 64.813                                             | 0.394 | 282            |
| 64.5705          | 0.6715 | 152            | 78.94707                         | 0.5593 | 214            | 69.526                                             | 0.146 | 212            |
| 69.6008          | 0.7693 | 212            |                                  |        |                | 79.044                                             | 0.146 | 214            |
|                  |        |                |                                  |        |                |                                                    |       |                |

**Table S3:** Size of each element estimated by Scherrer's formula

| Sample                                             | Size (nm) |
|----------------------------------------------------|-----------|
| MoO <sub>3</sub>                                   | 34.264    |
| Bi <sub>2</sub> MoO <sub>6</sub>                   | 31.595    |
| MoO <sub>3</sub> /Bi <sub>2</sub> MoO <sub>6</sub> | 37.003    |

## 6. XPS Table Atomic weight percentage

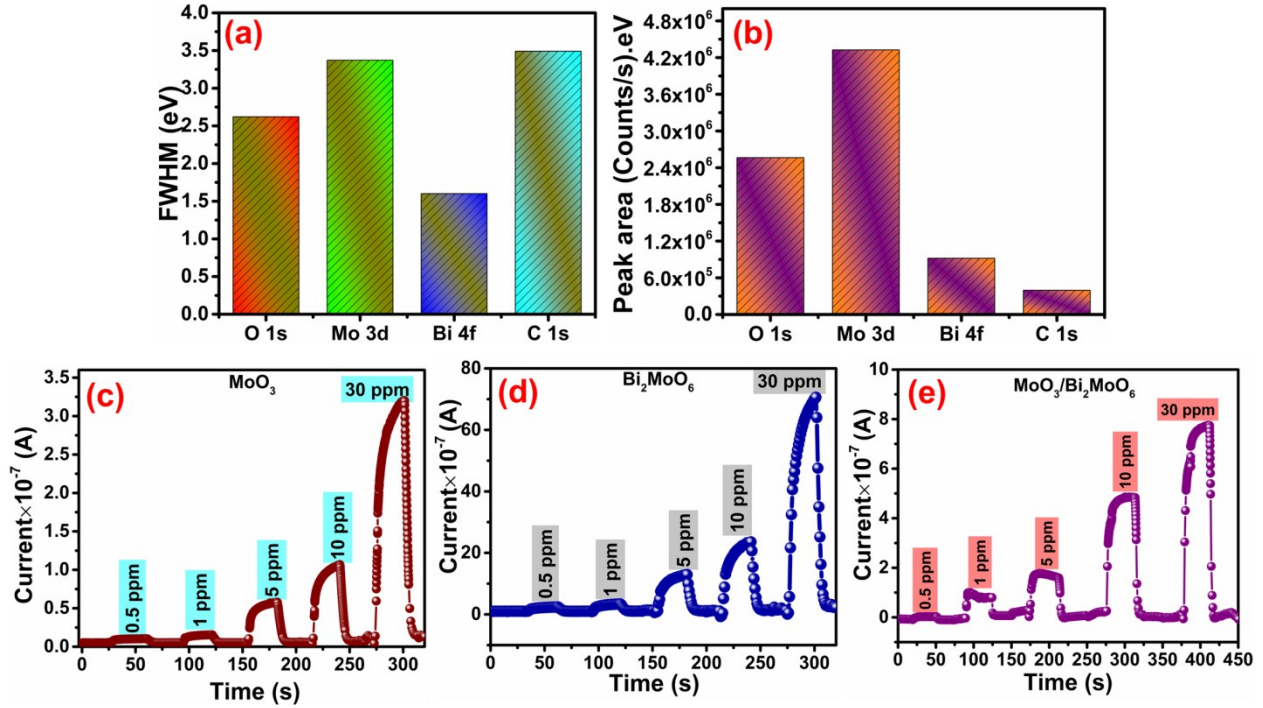

**Fig. S2.** (a) FWHM of each element presents in XPS spectrum (b) Peak area of each element in XPS. Acetone sensing characteristics for (c) MoO<sub>3</sub> (d) Bi<sub>2</sub>MoO<sub>6</sub> and (e) MoO<sub>3</sub>/Bi<sub>2</sub>MoO<sub>6</sub> in the range of 0.5-30 ppm.

**Table S4:** Peak binding energy, FWHM, peak area and atomic percentage of each element estimated by XPS spectra

| Element | Peak BE | FWHM (eV) | Peak Area (CPS.eV) | Atomic (%) |
|---------|---------|-----------|--------------------|------------|
| O 1s    | 530.83  | 2.62      | 2.56236E6          | 57.03      |
| Mo 3d   | 233.16  | 3.37      | 4.32426E6          | 20.48      |
| Bi 4f   | 159.38  | 1.6       | 918665.15          | 1.2        |
| C 1s    | 285.12  | 3.49      | 395459.69          | 21.3       |

## 6. UV-Visible absorption peaks and optical band gap energy

Tauc equation

$$\alpha h\nu = A(h\nu - E_g)^n \quad (S2)$$

Where A is a constant,  $\nu$  is the band transition frequency, and exponent n describes the band transition's characteristics.  $n=1/2$  and  $3/2$ , respectively, for direct allowed and direct forbidden transitions. Indirect allowed transitions have  $n=2$  and indirect forbidden transitions have  $n=3$  respectively.

**Table S5:** Absorption peaks and band gaps of the materials by UV-visible absorption analysis

| Sample                                             | Peaks (at nm) | Optical band gap energy (eV) |
|----------------------------------------------------|---------------|------------------------------|
| MoO <sub>3</sub>                                   | 233, 300      | 3.37                         |
| Bi <sub>2</sub> MoO <sub>6</sub>                   | 232           | 2.93                         |
| MoO <sub>3</sub> /Bi <sub>2</sub> MoO <sub>6</sub> | 227, 300      | 3.20                         |

## 8. Acetone sensing studies

**Table S6:** Sensor response of MoO<sub>3</sub>, Bi<sub>2</sub>MoO<sub>6</sub>, and MoO<sub>3</sub>/Bi<sub>2</sub>MoO<sub>6</sub> with respect to the acetone concentration

| Concentration (ppm) | MoO <sub>3</sub> | Bi <sub>2</sub> MoO <sub>6</sub> | MoO <sub>3</sub> /Bi <sub>2</sub> MoO <sub>6</sub> |
|---------------------|------------------|----------------------------------|----------------------------------------------------|
| 0.5                 | 1.003            | 1.285                            | 1.431                                              |
| 1                   | 2.004            | 2.249                            | 4.965                                              |
| 5                   | 8.680            | 11.780                           | 8.793                                              |
| 10                  | 20.299           | 22.440                           | 24.265                                             |
| 30                  | 31.490           | 34.795                           | 38.745                                             |
| 50                  | 53.310           | 44.200                           | 80.972                                             |
| 100                 | 64.927           | 53.540                           | 104.153                                            |
| 200                 | 95.455           | 67.250                           | 162.346                                            |
| 500                 | 104.780          | 84.400                           | 184.678                                            |
| 1000                | 108.744          | 94.150                           | 302.062                                            |
| 1500                | 113.714          | 155.250                          | 460.387                                            |

### Limit of detection (LOD) analysis for MoO<sub>3</sub>, Bi<sub>2</sub>MoO<sub>6</sub>, and MoO<sub>3</sub>/Bi<sub>2</sub>MoO<sub>6</sub>

Limit of detection formula

$$LOD = \frac{3\sigma}{s} \quad (S3)$$

Where  $\sigma$  is the standard deviation and  $s$  is the slope of the linearly fitted graph between sensor response and concentration.

**Table S7:** LOD of each device in different concentration ranges and in logarithmic scale

| Total                 | MoO <sub>3</sub> (ppm) | Bi <sub>2</sub> MoO <sub>6</sub> (ppm) | MoO <sub>3</sub> /Bi <sub>2</sub> MoO <sub>6</sub> (ppm) |
|-----------------------|------------------------|----------------------------------------|----------------------------------------------------------|
| In 0.5-1500 ppm range | 60.755                 | 61.965                                 | 0.560                                                    |
| In Logarithmic scale  | 0.594                  | 0.559                                  | 0.168                                                    |
| In 1-30 ppm range     | 8.100                  | 8.451                                  | 0.287                                                    |
| In 50-1500 range      | 872.822                | 312.515                                | 0.224                                                    |

**Table S8:** Sensor response at different temperature for MoO<sub>3</sub>, Bi<sub>2</sub>MoO<sub>6</sub>, and MoO<sub>3</sub>/Bi<sub>2</sub>MoO<sub>6</sub>

| Temperature (°C) | MoO <sub>3</sub> | Bi <sub>2</sub> MoO <sub>6</sub> | MoO <sub>3</sub> /Bi <sub>2</sub> MoO <sub>6</sub> |
|------------------|------------------|----------------------------------|----------------------------------------------------|
| 27               | 5.585            | 10.490                           | 9.605                                              |
| 50               | 10.631           | 16.020                           | 18.385                                             |
| 100              | 20.299           | 22.440                           | 24.265                                             |
| 150              | 35.988           | 30.730                           | 34.425                                             |
| 200              | 40.080           | 26.040                           | 54.115                                             |
| 250              | 47.106           | 23.850                           | 39.940                                             |

|     |        |        |        |
|-----|--------|--------|--------|
| 300 | 63.054 | 22.330 | 22.280 |
| 350 | 72.236 | 21.920 | 14.000 |
| 400 | 42.275 | 19.510 | 10.710 |

**Table S9:** Selectivity studies for MoO<sub>3</sub>, Bi<sub>2</sub>MoO<sub>6</sub>, and MoO<sub>3</sub>/Bi<sub>2</sub>MoO<sub>6</sub>

| Analytes     | MoO <sub>3</sub> | Bi <sub>2</sub> MoO <sub>6</sub> | MoO <sub>3</sub> /Bi <sub>2</sub> MoO <sub>6</sub> |
|--------------|------------------|----------------------------------|----------------------------------------------------|
| Acetone      | 20.299           | 22.44                            | 24.265                                             |
| Methanol     | 10.469           | 20.964                           | 12.896                                             |
| Ethanol      | 9.21             | 19.559                           | 10.452                                             |
| Ammonia      | 15.921           | 20.915                           | 6.349                                              |
| Aniline      | 8.6              | 15.981                           | 5.211                                              |
| Xylene       | 5.217            | 13.91                            | 4.921                                              |
| Formaldehyde | 4.321            | 12.056                           | 4.265                                              |
| Water        | 2.395            | 11.459                           | 2.526                                              |

### Response and recovery times formula

$$I(t) = I_a \left( e^{-t/t_{response}} \right) \quad (S4)$$

$$I(t) = I_a \left( 1 - e^{-t/t_{recovery}} \right) \quad (S5)$$

**Table S10:** Response and recovery times

| Material                                           | Response time (s) | Recovery times (s) |
|----------------------------------------------------|-------------------|--------------------|
| MoO <sub>3</sub>                                   | 4.76              | 6.57               |
| Bi <sub>2</sub> MoO <sub>6</sub>                   | 6.88              | 6.26               |
| MoO <sub>3</sub> /Bi <sub>2</sub> MoO <sub>6</sub> | 6.86              | 4.64               |

## 9. DFT studies

### Formulae used for calculating electronic properties

$$HOMO - LUMO \text{ gap } (\Delta E) = E_{LUMO} - E_{HOMO} \quad (S6)$$

$$\text{Electron affinity (EA)} = -E_{LUMO} \quad (S7)$$

$$\text{Ionization potential (IP)} = -E_{HOMO} \quad (S8)$$

$$\text{Electronegativity } (\mu) = -\left( \frac{E_{HOMO} + E_{LUMO}}{2} \right) \quad (S9)$$

$$\text{Chemical potential } (\chi) = \left( \frac{E_{HOMO} + E_{LUMO}}{2} \right) \quad (S10)$$

$$\text{Chemical hardness } (\eta) = \left( \frac{E_{LUMO} - E_{HOMO}}{2} \right) \quad (S11)$$

$$\text{Chemical softness } (\sigma) = \frac{1}{\eta} \quad (\text{S12})$$

$$\text{Nucleophilic index } (\omega) = -\frac{\mu^2}{2\eta} \quad (\text{S13})$$

$$\text{Charge transfer } (\Delta N_{max})_{\text{air}} = -\left(\frac{\mu}{\eta}\right) \quad (\text{S14})$$

$$SR = \frac{E_{HLG}(\text{air}) - E_{HLG}(\text{analyte})}{E_{HLG}(\text{air})} \quad (\text{S15})$$

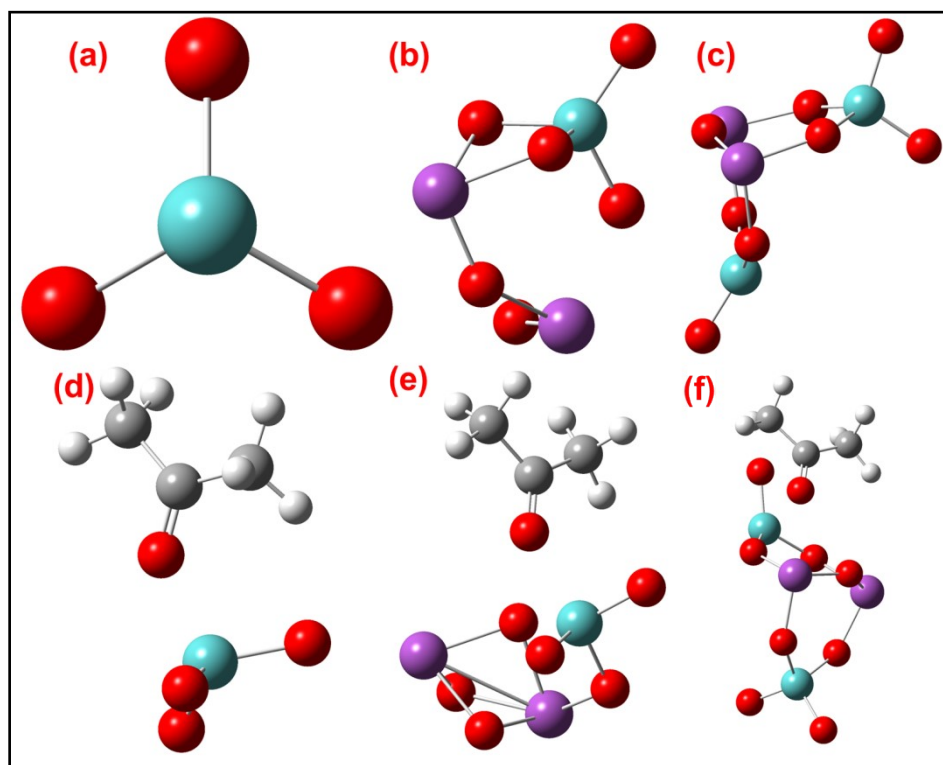

**Fig. S3.** Optimized structures for (a)  $\text{MoO}_3$  (b)  $\text{Bi}_2\text{MoO}_6$  (c)  $\text{MoO}_3/\text{Bi}_2\text{MoO}_6$  (d)  $\text{MoO}_3$ -acetone (e)  $\text{Bi}_2\text{MoO}_6$ -acetone (f)  $\text{MoO}_3/\text{Bi}_2\text{MoO}_6$ -acetone species.



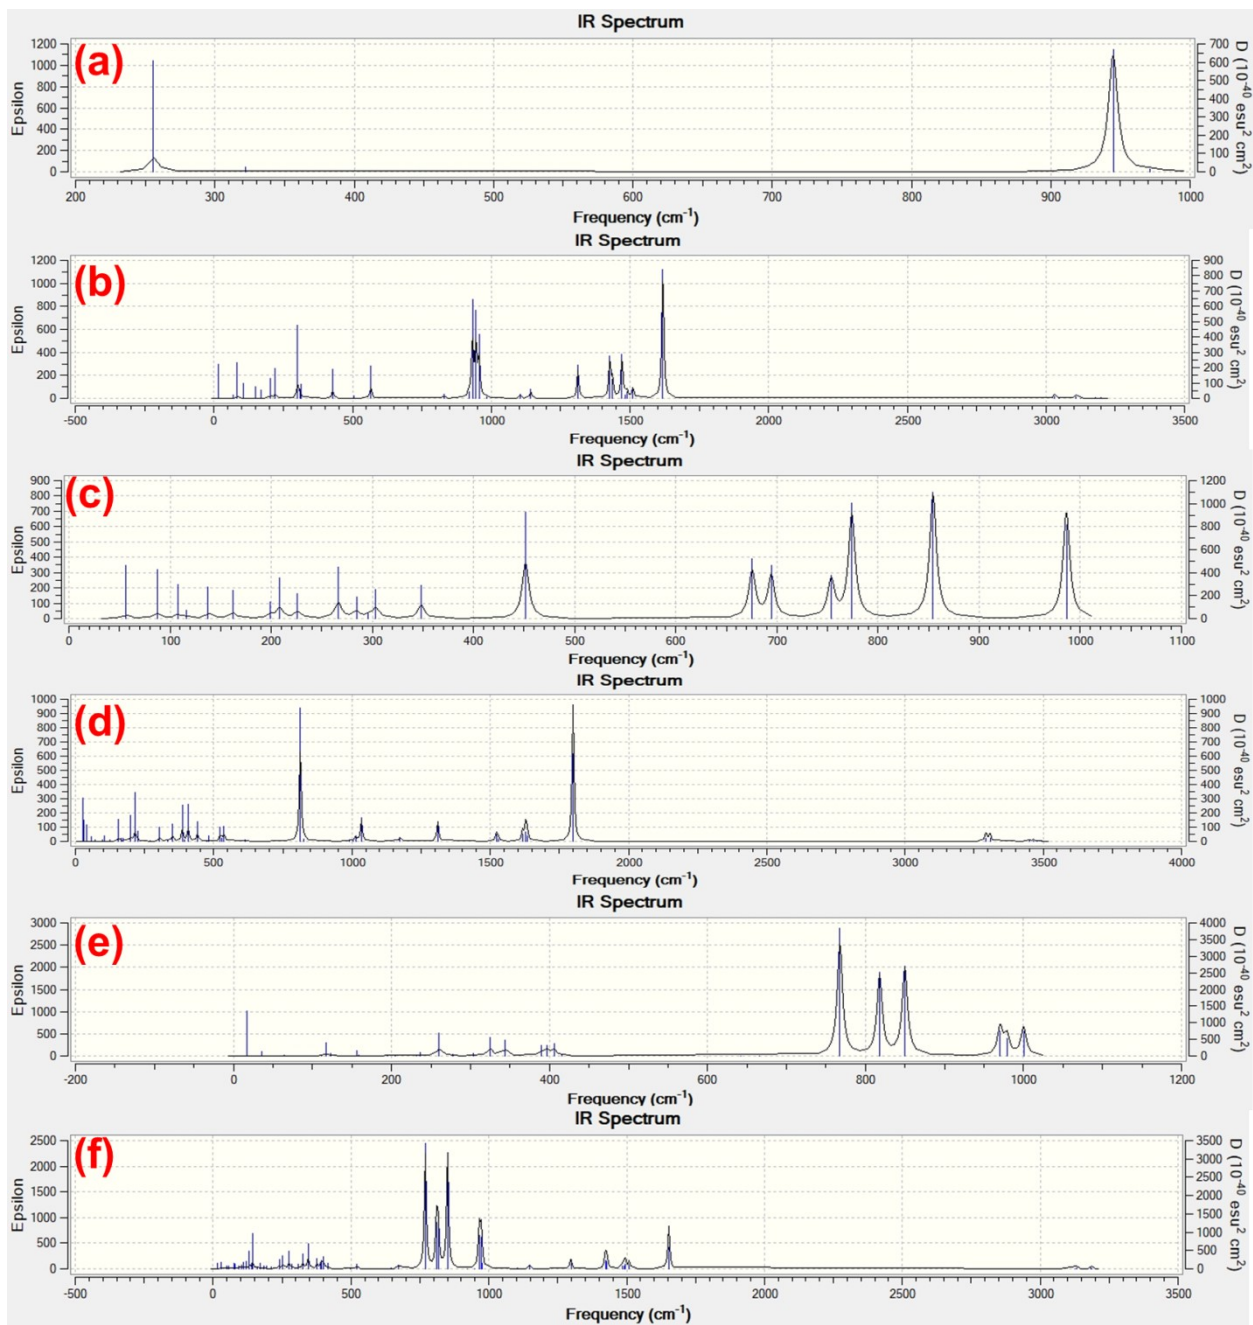

**Fig. S4.** Infrared spectrum based on DFT studies for (a) MoO<sub>3</sub> (b) Bi<sub>2</sub>MoO<sub>6</sub> (c) MoO<sub>3</sub>/Bi<sub>2</sub>MoO<sub>6</sub> (d) MoO<sub>3</sub>-acetone (e) Bi<sub>2</sub>MoO<sub>6</sub>-acetone (f) MoO<sub>3</sub>/Bi<sub>2</sub>MoO<sub>6</sub>-acetone.



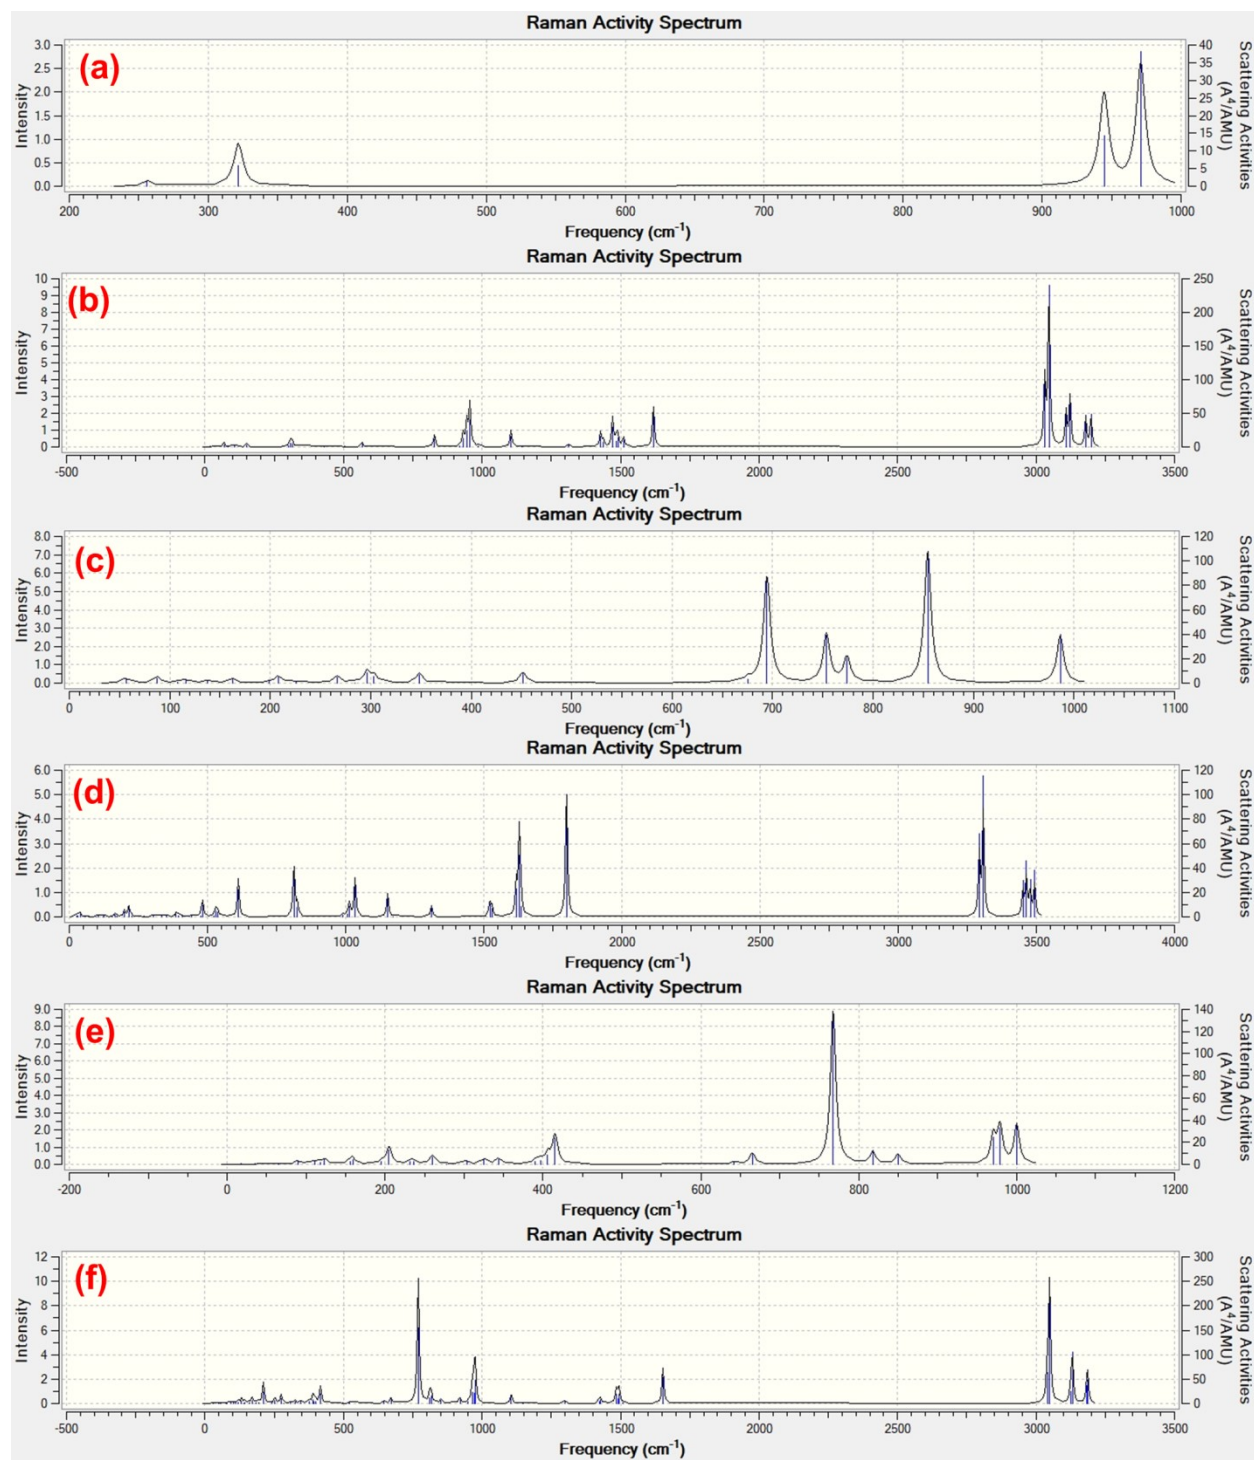

**Fig. S5.** Raman spectrum based on DFT studies for (a)  $\text{MoO}_3$  (b)  $\text{Bi}_2\text{MoO}_6$  (c)  $\text{MoO}_3/\text{Bi}_2\text{MoO}_6$  (d)  $\text{MoO}_3$ -acetone (e)  $\text{Bi}_2\text{MoO}_6$ -acetone (f)  $\text{MoO}_3/\text{Bi}_2\text{MoO}_6$ -acetone.

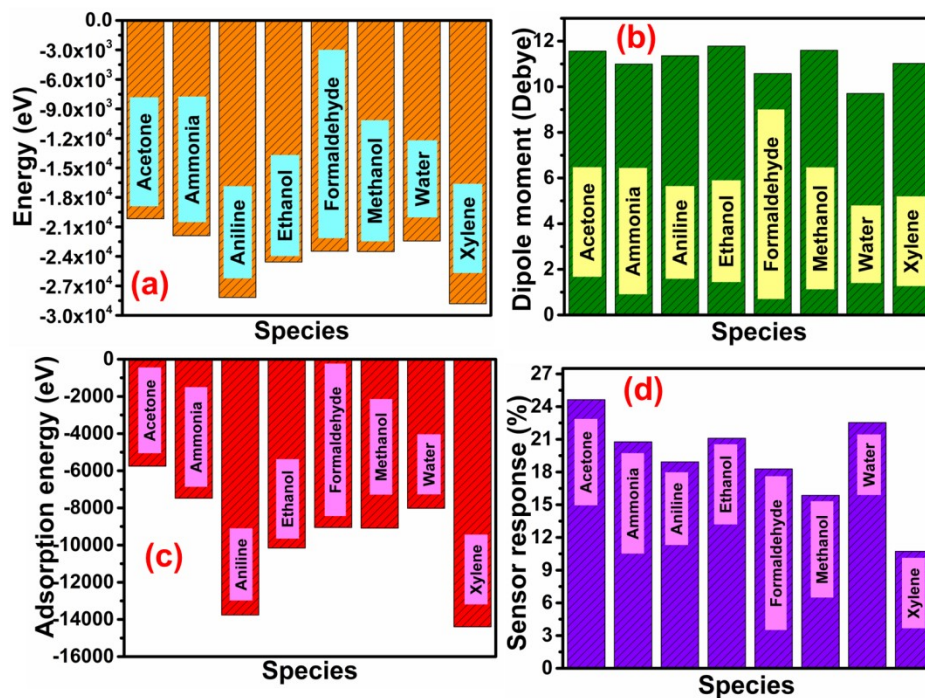

**Fig. S6.** Electronic parameters calculated by the DFT studies of MoO<sub>3</sub>/Bi<sub>2</sub>MoO<sub>6</sub> interaction with different VOCs (a) Total energy (b) Dipole moment (c) Adsorption energy (d) Sensor response.

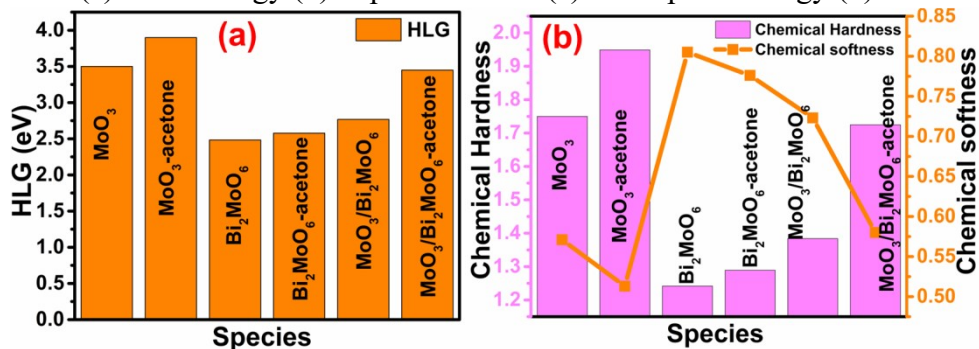

**Fig. S7.** (a) HOMO-LUMO gap (HLG) (b) Chemical hardness and softness.

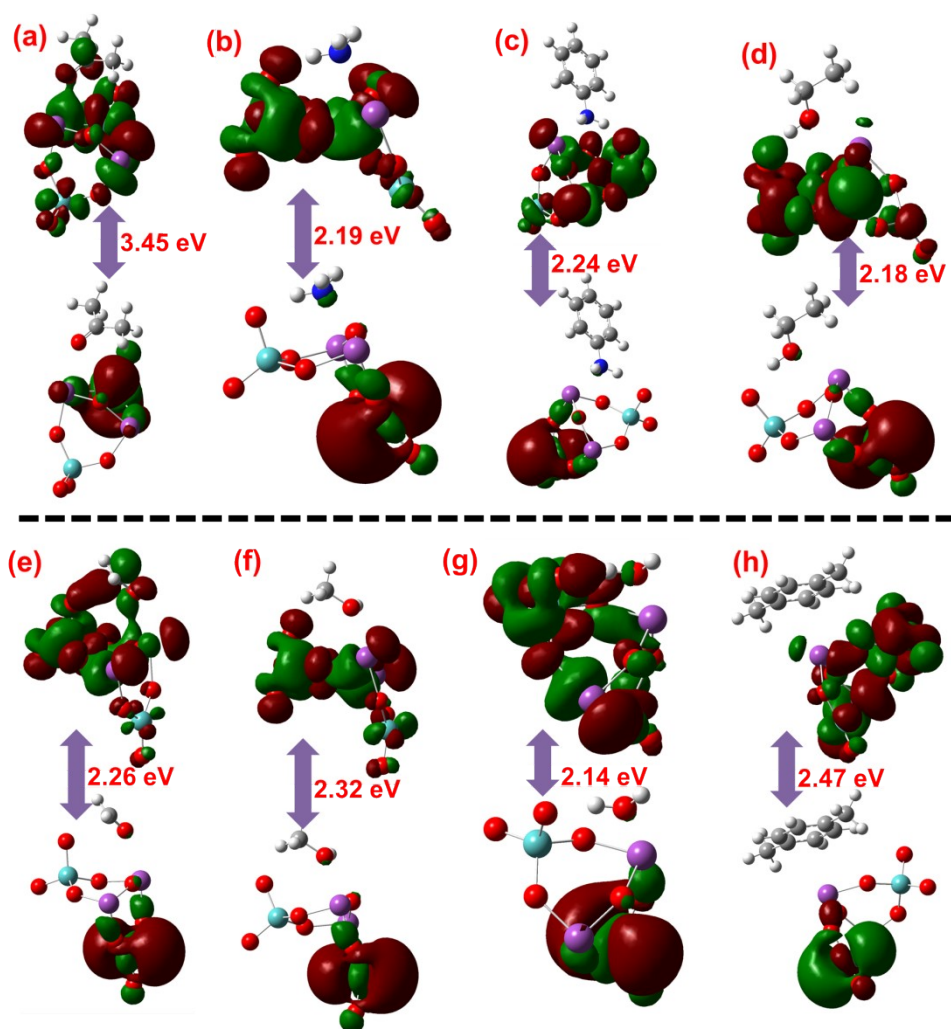

**Fig. S8.** HOMO-LUMO representation and their HLG energy for  $\text{MoO}_3/\text{Bi}_2\text{MoO}_6$  interaction with different VOCs (a) Acetone (b) Ammonia (c) Aniline (d) Ethanol (e) Formaldehyde (f) Methanol (g) Water (h) Xylene.

**Table S11:** Electronic parameters for  $\text{MoO}_3$ ,  $\text{Bi}_2\text{MoO}_6$ ,  $\text{MoO}_3/\text{Bi}_2\text{MoO}_6$  and interaction of these with acetone.

| Species                 | HO MO (eV) | LU MO (eV) | HO-LU MO gap, HLG (eV) | Electron affinity (eV) | Ionization potential (eV) | Electronegativity (eV) | Chemical potential (eV) | Chemical hardness (eV) | Chemical softness (eV) | Nucleophilicity index | N max | E (eV)    | Dipole moment (Debye) |
|-------------------------|------------|------------|------------------------|------------------------|---------------------------|------------------------|-------------------------|------------------------|------------------------|-----------------------|-------|-----------|-----------------------|
| $\text{MoO}_3$          | 8.891      | 5.391      | 3.500                  | 5.391                  | 8.891                     | 7.141                  | 7.141                   | 1.750                  | 0.571                  | 14.571                | 4.081 | -7979.040 | 5.241                 |
| $\text{MoO}_3$ -acetone | 7.642      | 3.744      | 3.898                  | 3.744                  | 7.642                     | 5.693                  | 5.693                   | 1.949                  | 0.513                  | -8.315                | 2.921 | 13236.540 | 11.378                |

|                                                              |       |       |       |       |       |       |       |       |       |        |       |           |        |
|--------------------------------------------------------------|-------|-------|-------|-------|-------|-------|-------|-------|-------|--------|-------|-----------|--------|
| <b>Bi<sub>2</sub>MoO<sub>6</sub></b>                         | -     | -     | -     | -     | -     | -     | -     | -     | -     | -      | -     | -         | -      |
|                                                              | 5.813 | 3.329 | 2.484 | 3.329 | 5.813 | 4.571 | 4.571 | 1.242 | 0.805 | -8.412 | 3.681 | 20356.954 | 7.597  |
| <b>Bi<sub>2</sub>MoO<sub>6</sub>-acetone</b>                 | -     | -     | -     | -     | -     | -     | -     | -     | -     | -      | -     | -         | -      |
|                                                              | 5.506 | 2.928 | 2.578 | 2.928 | 5.506 | 4.217 | 4.217 | 1.289 | 0.776 | -6.898 | 3.271 | 25612.930 | 7.978  |
| <b>MoO<sub>3</sub>/Bi<sub>2</sub>MoO<sub>6</sub></b>         | -     | -     | -     | -     | -     | -     | -     | -     | -     | -      | -     | -         | -      |
|                                                              | 6.993 | 4.226 | 2.768 | 4.226 | 6.993 | 5.609 | 5.609 | 1.384 | 0.723 | 11.369 | 4.054 | 14420.233 | 8.091  |
| <b>MoO<sub>3</sub>/Bi<sub>2</sub>MoO<sub>6</sub>-acetone</b> | -     | -     | -     | -     | -     | -     | -     | -     | -     | -      | -     | -         | -      |
|                                                              | 4.638 | 1.188 | 3.450 | 1.188 | 4.638 | 2.913 | 2.913 | 1.725 | 0.580 | -2.460 | 1.689 | 20169.931 | 11.564 |

**Table S12:** Adsorption energies and sensor response for MoO<sub>3</sub>, Bi<sub>2</sub>MoO<sub>6</sub>, MoO<sub>3</sub>/ Bi<sub>2</sub>MoO<sub>6</sub>

| Species                                               | Adsorption Energy (eV) | Sensor response (%) |
|-------------------------------------------------------|------------------------|---------------------|
| MoO <sub>3</sub>                                      | -5257.499              | 10.210              |
| Bi <sub>2</sub> MoO <sub>6</sub>                      | -5255.976              | 3.784               |
| MoO <sub>3</sub> / Bi <sub>2</sub> MoO <sub>6</sub> - | -5749.698              | 24.638              |

**Table S13:** Selectivity studies for MoO<sub>3</sub>/Bi<sub>2</sub>MoO<sub>6</sub> based on DFT studies

| Species                                                            | Energy (eV) | Dipole moment (Debye) | Adsorption energy (eV) |
|--------------------------------------------------------------------|-------------|-----------------------|------------------------|
| <b>MoO<sub>3</sub>/Bi<sub>2</sub>MoO<sub>6</sub>-acetone</b>       | -           | -                     | -                      |
|                                                                    | 0169.9313   | 11.5643               | 5749.698               |
| <b>MoO<sub>3</sub>/ Bi<sub>2</sub>MoO<sub>6</sub>-ammonia</b>      | -           | -                     | -                      |
|                                                                    | 21896.5715  | 10.995                | 7476.338               |
| <b>MoO<sub>3</sub>/ Bi<sub>2</sub>MoO<sub>6</sub>-aniline</b>      | -           | -                     | -                      |
|                                                                    | 28182.605   | 11.361                | 13762.372              |
| <b>MoO<sub>3</sub>/ Bi<sub>2</sub>MoO<sub>6</sub>-ethanol</b>      | -           | -                     | -                      |
|                                                                    | 24576.125   | 11.784                | 10155.892              |
| <b>MoO<sub>3</sub>/ Bi<sub>2</sub>MoO<sub>6</sub>-formaldehyde</b> | -           | -                     | -                      |
|                                                                    | 23472.7874  | 10.577                | 9052.554               |
| <b>MoO<sub>3</sub>/ Bi<sub>2</sub>MoO<sub>6</sub>-methanol</b>     | -           | -                     | -                      |
|                                                                    | 23506.2573  | 11.5987               | 9086.024               |
| <b>MoO<sub>3</sub>/ Bi<sub>2</sub>MoO<sub>6</sub>-water</b>        | -           | -                     | -                      |
|                                                                    | 22437.1897  | 9.7084                | 8016.956               |
| <b>MoO<sub>3</sub>/ Bi<sub>2</sub>MoO<sub>6</sub>-xylene</b>       | -           | -                     | -                      |
|                                                                    | 28815.5567  | 11.0252               | 14395.323              |

**Table S14:** Electronic parameters for MoO<sub>3</sub>/Bi<sub>2</sub>MoO<sub>6</sub> after interaction with different VOCs

| Species                                                           | HOMO (eV) | LUMO (eV) | Band gap (eV) | Electron affinity (eV) | Ionization potential (eV) | Electro negativity (eV) | Chemical potential (eV) | Chemical hardness | Chemical Softness | Nucleophilicity index | Charge transfer ( $N_{max}$ ) |
|-------------------------------------------------------------------|-----------|-----------|---------------|------------------------|---------------------------|-------------------------|-------------------------|-------------------|-------------------|-----------------------|-------------------------------|
| MoO <sub>3</sub> /Bi <sub>2</sub> MoO <sub>6</sub> -acetone       | -4.638    | -1.188    | 3.450         | 1.188                  | 4.638                     | 2.913                   | -2.913                  | 1.725             | 0.580             | -2.460                | 1.689                         |
| MoO <sub>3</sub> / Bi <sub>2</sub> MoO <sub>6</sub> -ammonia      | -5.338    | -3.145    | 2.193         | 3.145                  | 5.338                     | 4.241                   | -4.241                  | 1.096             | 0.912             | -8.202                | 3.868                         |
| MoO <sub>3</sub> / Bi <sub>2</sub> MoO <sub>6</sub> -aniline      | -5.396    | -3.152    | 2.244         | 3.152                  | 5.396                     | 4.274                   | -4.274                  | 1.122             | 0.891             | -8.142                | 3.810                         |
| MoO <sub>3</sub> / Bi <sub>2</sub> MoO <sub>6</sub> -ethanol      | -5.418    | -3.234    | 2.184         | 3.234                  | 5.418                     | 4.326                   | -4.326                  | 1.092             | 0.916             | -8.567                | 3.961                         |
| MoO <sub>3</sub> / Bi <sub>2</sub> MoO <sub>6</sub> -formaldehyde | -5.558    | -3.296    | 2.262         | 3.296                  | 5.558                     | 4.427                   | -4.427                  | 1.131             | 0.884             | -8.663                | 3.914                         |
| MoO <sub>3</sub> / Bi <sub>2</sub> MoO <sub>6</sub> -methanol     | -5.430    | -3.101    | 2.329         | 3.101                  | 5.430                     | 4.265                   | -4.265                  | 1.164             | 0.859             | -7.813                | 3.663                         |
| MoO <sub>3</sub> / Bi <sub>2</sub> MoO <sub>6</sub> -water        | -5.437    | -3.293    | 2.144         | 3.293                  | 5.437                     | 4.365                   | -4.365                  | 1.072             | 0.933             | -8.885                | 4.071                         |
| MoO <sub>3</sub> / Bi <sub>2</sub> MoO <sub>6</sub> -xylene       | -5.561    | -3.090    | 2.471         | 3.090                  | 5.561                     | 4.325                   | -4.325                  | 1.236             | 0.809             | -7.570                | 3.500                         |

**Table S15:** Sensor responses calculated by using DFT results

| Species                                                           | Sensor response (%) |
|-------------------------------------------------------------------|---------------------|
| MoO <sub>3</sub> /Bi <sub>2</sub> MoO <sub>6</sub> -acetone       | 24.638              |
| MoO <sub>3</sub> / Bi <sub>2</sub> MoO <sub>6</sub> -ammonia      | 20.773              |
| MoO <sub>3</sub> / Bi <sub>2</sub> MoO <sub>6</sub> -aniline      | 18.930              |
| MoO <sub>3</sub> / Bi <sub>2</sub> MoO <sub>6</sub> -ethanol      | 21.098              |
| MoO <sub>3</sub> / Bi <sub>2</sub> MoO <sub>6</sub> -formaldehyde | 18.280              |
| MoO <sub>3</sub> / Bi <sub>2</sub> MoO <sub>6</sub> -methanol     | 15.859              |
| MoO <sub>3</sub> / Bi <sub>2</sub> MoO <sub>6</sub> -water        | 22.543              |
| MoO <sub>3</sub> / Bi <sub>2</sub> MoO <sub>6</sub> -xylene       | 10.729              |
